# Supplementary material for: Analysis of Binding Determinants for Different Classes of Competitive and Noncompetitive Inhibitors of Glycine Transporters
Source: MDPI journal article supplement (doi:10.3390/ijms23148050), 2022-07-21
Supplement: s1 [file s1]

|                     |     |                                                                                             |     |
|---------------------|-----|---------------------------------------------------------------------------------------------|-----|
| hGlyT-1             | 98  | LKRGNGWNGQIEFVLTSVGYAVGLGNVWRFPYLCYRNGGGAFMPPYFIMLIFCGIPLFFMELSPGQFASQCGLGWV-RISPMFKGVGYGMM | 186 |
| hGlyT-2             | 189 | KARGNWSSKLDLFILSMVGYAVGLGNVWRFPYLAQNGGGAFILPYLMLLALAGLPIFFLEVSLGQFASQGFVSQVW-KAIPALQGGCIAML | 277 |
| hGlyT-1 (6ZPL/6ZBV) | 98  | LKRGNGWNGQIEFVLTSVGYAVGLGNVWRFPYLCYRNGGGAFMPPYFIMLIFCGIPLFFMELSPGQFASQCGLGWV-RISPMFKGVGYGMM | 186 |
| dDAT (4M48)         | 25  | DERETWSGKVDFLLSVIGFAVDLANVWRFPYLCYRNGGGAFILVPGIMLAVGGIPLFYMBLALGQHNRKGAITCWGRILVPLFKGIGYAVV | 114 |
| dDAT (4XP4/4XP9)    | 25  | DERETWSGKVDFLLSVIGFAVDLANVWRFPYLCYRNGGGAFILVPGIMLAVGGIPLFYMBLALGQHNRKGAITCWGRILVPLFKGIGYAVV | 114 |
| dDAT (4XPH)         | 25  | DERETWSGKVDFLLSVIGFAVDLANVWRFPYLCYRNGGGAFILVPGIMLAVGGIPLFYMBLALGQHNRKGAITCWGRILVPLFKGIGYAVV | 114 |
| hSERT (5I73)        | 77  | GERETWSGKVDFLLSVIGFAVDLANVWRFPYLCYRNGGGAFILVPGIMLAVGGIPLFYMBLALGQHNRKGAITCWGRILVPLFKGIGYAVV | 166 |
| hGlyT-1             | 187 | VVSTYIGIYYNVVICIAFYFFSSMTHVLFWAYCNPWNTHDCAG---VLDASNLTNNGSRPAALPSNLHLLNHSLQRT-----          | 262 |
| hGlyT-2             | 278 | IISVLIAIYYNVVICIAFYFFSSMTHVLFWAYCNPWNTHDCAG---VLDASNLTNNGSRPAALPSNLHLLNHSLQRT-----          | 367 |
| hGlyT-1 (6ZPL/6ZBV) | 187 | VVSTYIGIYYNVVICIAFYFFSSMTHVLFWAYCNPWNTHDCAG---VLDASNLTNNGSRPAALPSNLHLLNHSLQRT-----          | 262 |
| dDAT (4M48)         | 115 | LIAFYVDFFYNVIAWSLRFFFASTNSLPWTSCNNIWNTPNCRP---FES-----                                      | 208 |
| dDAT (4XP4/4XP9)    | 115 | LIAFYVDFFYNVIAWSLRFFFASTNSLPWTSCNNIWNTPNCRP---FES-----                                      | 208 |
| dDAT (4XPH)         | 115 | LIAFYVDFFYNVIAWSLRFFFASTNSLPWTSCNNIWNTPNCRP---FES-----                                      | 208 |
| hSERT (5I73)        | 167 | LIAFYIASYYNTIMAWALYLLISSFTDQLPWTSCNNIWNTPNCRP---FES-----                                    | 224 |
| hGlyT-1             | 263 | -SPSEYYWRLVYLKL--SDDIGNFGEVRLPLLGCLGVSWLVVFLCLIRGVKSSGKVYFTATFPYVVLTLFVRGVTLEGAFGIMYYLT     | 349 |
| hGlyT-2             | 368 | VSGSEYYWRLVYLKL--SAGIEYFGEIRWPLALCLFLAWVIVYASLAGIKTSQKVYFTATFPYVVLTLFVRGVTLEGAFGIMYYLT      | 455 |
| hGlyT-1 (6ZPL/6ZBV) | 263 | -SPSEYYWRLVYLKL--SDDIGNFGEVRLPLLGCLGVSWLVVFLCLIRGVKSSGKVYFTATFPYVVLTLFVRGVTLEGAFGIMYYLT     | 349 |
| dDAT (4M48)         | 209 | QSAASEYFNRYILELNRSEGIHDLGAIKWDMALCLLIVLYLCYFSLWKGISTSGKVWVFTALFPYAVLLILLIRGLTLPGSFLGIQYYLT  | 298 |
| dDAT (4XP4/4XP9)    | 209 | QSAASEYFNRYILELNRSEGIHDLGAIKWDMALCLLIVLYLCYFSLWKGISTSGKVWVFTALFPYAVLLILLIRGLTLPGSFLGIQYYLT  | 298 |
| dDAT (4XPH)         | 209 | QSAASEYFNRYILELNRSEGIHDLGAIKWDMALCLLIVLYLCYFSLWKGISTSGKVWVFTALFPYAVLLILLIRGLTLPGSFLGIQYYLT  | 298 |
| hSERT (5I73)        | 225 | TSPAEEYFTRVLQIHRSKGLDGGISVQLALCLLIFTVIYFISWKGISTSGKVWVFTALFPYAVLLILLIRGLTLPGSFLGIQYYLT      | 314 |
| hGlyT-1             | 350 | PQWDKILEAKVWGDAAQIFYSLGCAWGLITMASYNKFNHNCYRDSVIIISITNCATSVYAGFVIFSIILGFMANHLLGVDSVRVADH-GPG | 438 |
| hGlyT-2             | 456 | PKWEKLTDAVWGDAAQIFYSLSAAWGLITLSSYNKFNHNCYRDLTIVTCTNSATSIAGFVIFSVIGFMANERKVNIEVADQ-GPG       | 544 |
| hGlyT-1 (6ZPL/6ZBV) | 350 | PQWDKILEAKVWGDAAQIFYSLGCAWGLITMASYNKFNHNCYRDSVIIISITNCATSVYAGFVIFSIILGFMANHLLGVDSVRVADH-GPG | 438 |
| dDAT (4M48)         | 299 | PNFSAIYKAEVWDAATQVFFSLGPGFGVLLAYASYNKYHNNVYKDALLTSFINSATSFIAAGFVIFSVLGYMAHTLGVRIEDVATE-GPG  | 387 |
| dDAT (4XP4/4XP9)    | 299 | PNFSAIYKAEVWDAATQVFFSLGPGFGVLLAYASYNKYHNNVYKDALLTSFINSATSFIAAGFVIFSVLGYMAHTLGVRIEDVATE-GPG  | 387 |
| dDAT (4XPH)         | 299 | PNFSAIYKAEVWDAATQVFFSLGPGFGVLLAYASYNKYHNNVYKDALLTSFINSATSFIAAGFVIFSVLGYMAHTLGVRIEDVATE-GPG  | 387 |
| hSERT (5I73)        | 315 | PNWQKLELTGVWIDAAQIFYSLGPGFGVLLAFASYNKFNHNCYQDALVTSVVCMTSFVSGFVITVLGYMAEMRNEDEVSEVAKDAGPS    | 404 |
| hGlyT-1             | 439 | LAFAVYFPAALTLPLISPLWSLLFFFMILLGLGTQFCLETLVTAIVDEVGNEWILQKTYVTLGAVAGFLLGIPLTSQAGIYWLMLD      | 528 |
| hGlyT-2             | 545 | LAFAVYFPAALTLPLISPLWSLLFFFMILLGLGTQFCLETLVTAIVDEVGNEWILQKTYVTLGAVAGFLLGIPLTSQAGIYWLMLD      | 633 |
| hGlyT-1 (6ZPL/6ZBV) | 439 | LAFAVYFPAALTLPLISPLWSLLFFFMILLGLGTQFCLETLVTAIVDEVGNEWILQKTYVTLGAVAGFLLGIPLTSQAGIYWLMLD      | 528 |
| dDAT (4M48)         | 388 | LVFVYVPAAIATMPASTFWALIFFMMLATLGLDSSFGGSEAIITALSDEFP-KIKRNR-ELFVAGLFSLYFVVGASCTQGGFYFFHLLD   | 475 |
| dDAT (4XP4/4XP9)    | 388 | LVFVYVPAAIATMPASTFWALIFFMMLATLGLDSSFGGSEAIITALSDEFP-KIKRNR-ELFVAGLFSLYFVVGASCTQGGFYFFHLLD   | 475 |
| dDAT (4XPH)         | 388 | LVFVYVPAAIATMPASTFWALIFFMMLATLGLDSSFGGSEAIITALSDEFP-KIKRNR-ELFVAGLFSLYFVVGASCTQGGFYFFHLLD   | 475 |
| hSERT (5I73)        | 405 | LLFTIYAEAIANMPASTFFAIIFFMLITLGLDSSFAGLEGVITAVLDEFP-VWAKRRERFVLAVVITCFGSLVTLTFGGAYYVKLLE     | 493 |
| hGlyT-1             | 529 | NYAASFSLVVISIMCVAIMYIYGHNRNYFDIQMMLGFPPLFFQICWRVSPAIIFFILVFTVIQYQPIYNYHYQYQWAVAGIFLMAL      | 618 |
| hGlyT-2             | 634 | TYAASYALVIAIFELVGISYVYGLQRFCEDEIMMIGFQPNIFWKCWAFVTPILTIFILCFSEFYQWEMPTYSYGRYPNWSMVLGWLMLA   | 723 |
| hGlyT-1 (6ZPL/6ZBV) | 529 | NYAASFSLVVISIMCVAIMYIYGHNRNYFDIQMMLGFPPLFFQICWRVSPAIIFFILVFTVIQYQPIYNYHYQYQWAVAGIFLMAL      | 618 |
| dDAT (4M48)         | 476 | RYAAGYSILVAVFEEAIAVSWIYGTNRFSIEDIRDMIGFPPGRYWCQVRFVAPIFLFFITVYLLIGYEPLTYADYVYPSWANALGWCIAG  | 565 |
| dDAT (4XP4/4XP9)    | 476 | RYAAGYSILVAVFEEAIAVSWIYGTNRFSIEDIRDMIGFPPGRYWCQVRFVAPIFLFFITVYLLIGYEPLTYADYVYPSWANALGWCIAG  | 565 |
| dDAT (4XPH)         | 476 | RYAAGYSILVAVFEEAIAVSWIYGTNRFSIEDIRDMIGFPPGRYWCQVRFVAPIFLFFITVYLLIGYEPLTYADYVYPSWANALGWCIAG  | 565 |
| hSERT (5I73)        | 494 | EYATGPAVLTVLIEAVAVSWFYGITQFCRDVKEMLGFSFGWFWRICWVAISPLFLFFIISFLMSPQQLRLFYQNYPYWSIILGYAIGT    | 583 |
| hGlyT-1             | 619 | SSVLCIPLYAMFRLCRTDGDITLLQRLKNAATKPSRD                                                       | 653 |
| hGlyT-2             | 724 | CSVWIPIPMFVIMHLAGG-RFIERIKLVCSQPQD                                                          | 757 |
| hGlyT-1 (6ZPL/6ZBV) | 619 | SSVLCIPLYAMFRLCRTDGDITLLQRLKNAATKPSRD                                                       | 653 |
| dDAT (4M48)         | 566 | SSVVMIPAVAIKLLSTPG-SLRQRFTILTTPWRD                                                          | 599 |
| dDAT (4XP4/4XP9)    | 566 | SSVVMIPAVAIKLLSTPG-SLRQRFTILTTPWRD                                                          | 599 |
| dDAT (4XPH)         | 566 | SSVVMIPAVAIKLLSTPG-SLRQRFTILTTPWRD                                                          | 599 |
| hSERT (5I73)        | 584 | SSFICIPYIAYRLIITPG-TFKERIISITPBT                                                            | 617 |

**Figure S1.** Amino acids sequence alignment used to build models of glycine transporters.

**Table S1.** Assessment of the selected models and their templates. Models and matrices were evaluated without considering the N- and C-terminus and the EL2 loop fragment.

|           |               | Verify3D | QMEAN | DopeScore | Ramachandran plot |            |
|-----------|---------------|----------|-------|-----------|-------------------|------------|
|           |               |          |       |           | favoured          | disallowed |
| models    | GlyT-1 (4M48) | 80.96    | -3.84 | -82413.5  | 91.5              | 0.4        |
|           | GlyT-1 (6ZPL) | 77.65    | -4.03 | -79792.9  | 92.3              | 0.0        |
|           | GlyT-2 (4XP9) | 88.61    | -3.17 | -84396.3  | 93.5              | 0.0        |
|           | GlyT-2 (6ZPL) | 81.89    | -4.02 | -80678.7  | 93.0              | 0.0        |
| templates | GlyT-1 (6ZPL) | 79.17    | -3.83 | -79239.2  | 93.8              | 0.2        |
|           | DAT (4M48)    | 93.85    | -2.68 | -83617.4  | 90.7              | 0.2        |
|           | DAT (4XP9)    | 91.73    | -2.62 | -83761.5  | 94.7              | 0.0        |

## GlyT-1 inhibitors

### non-competitive

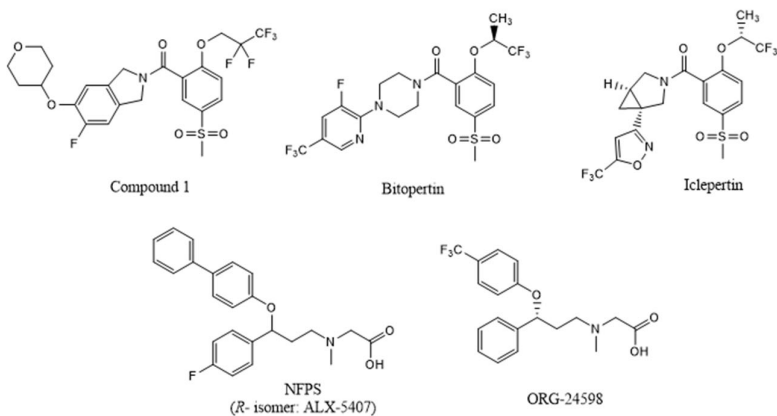

### competitive

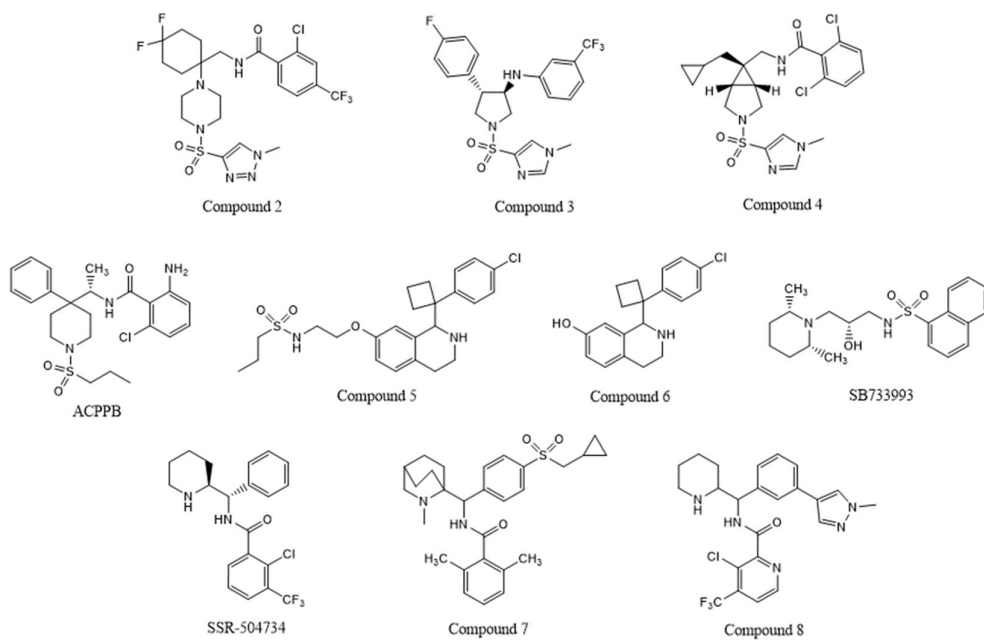

## GlyT-2 inhibitors

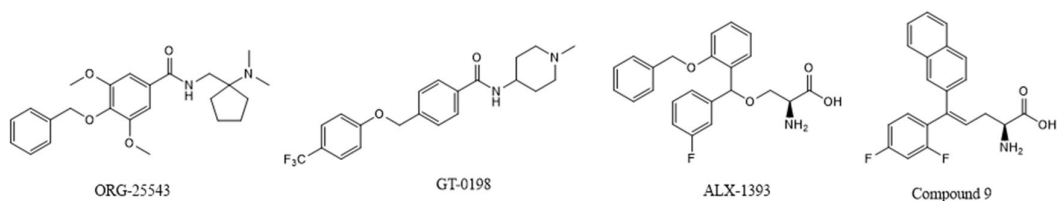

**Figure S2.** Structures of the compounds for which the detailed binding modes with glycine transporters were presented herein.



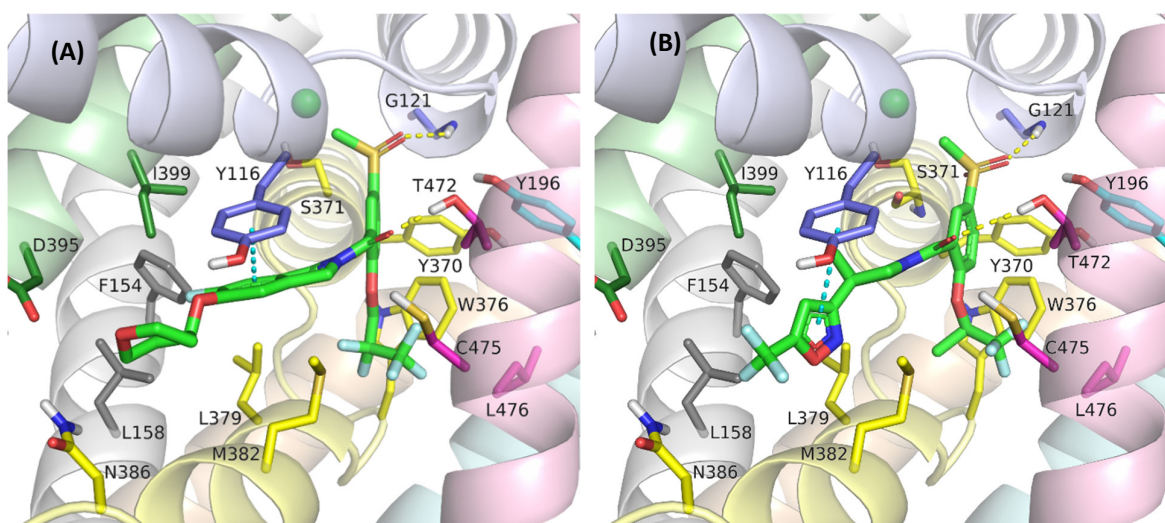

**Figure S3.** Binding mode of the compound **1** (A) and iclepertin (B) within GlyT-1 in inward-open state.

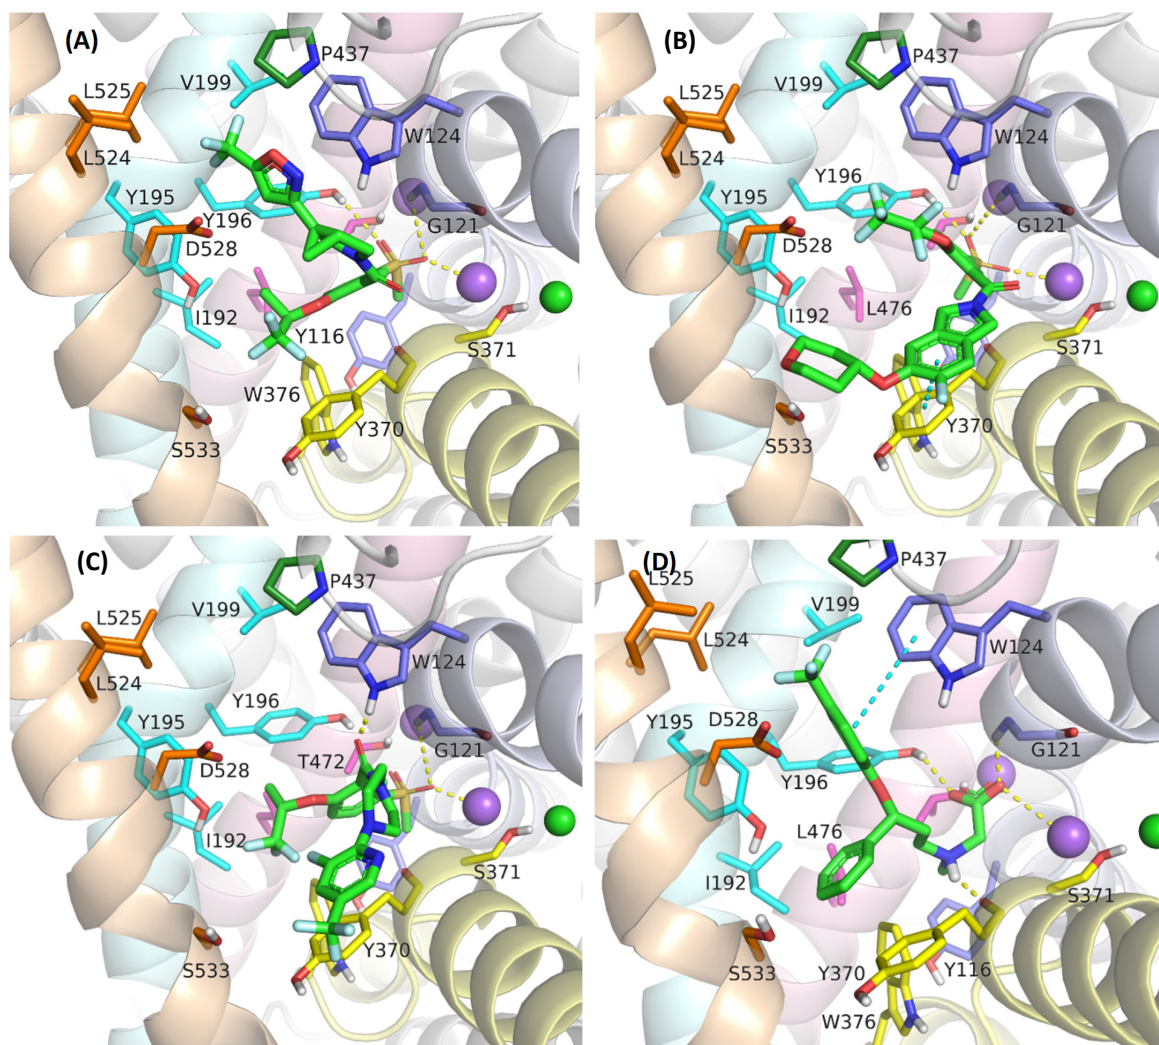

**Figure S4.** Binding mode of the iclepertin (A), compound **1** (B), bitopertin (C), and ORG-24598 (D) within GlyT-1 in outward-open state.

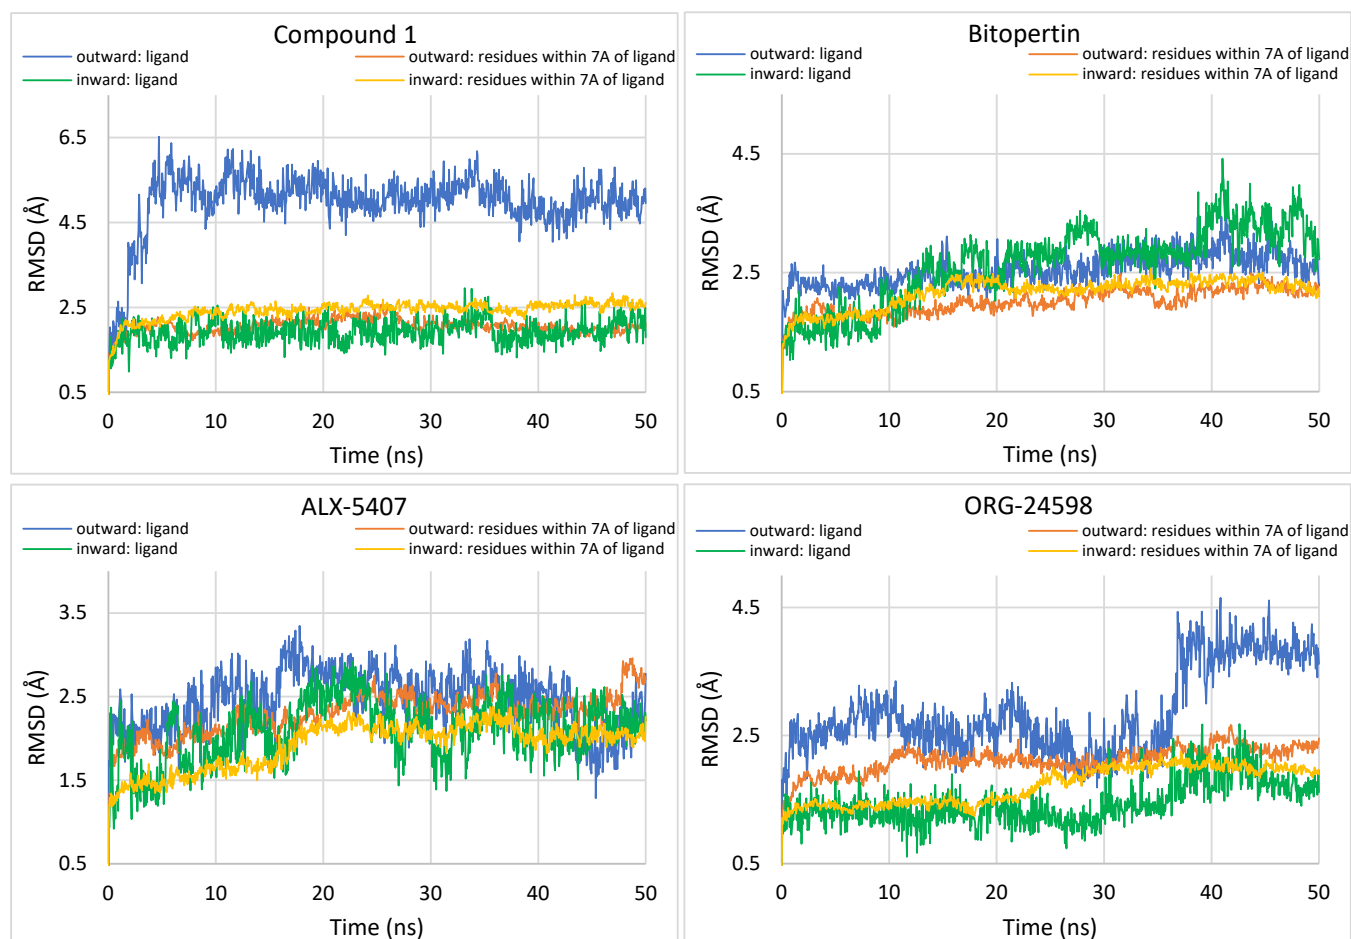

**Figure S5.** Comparison of RMSD changes in the course of molecular dynamics for compound **1**, bitopertin, ALX-5407, and ORG-24598 in complex with GlyT-1 in outward-open and inward-open states.



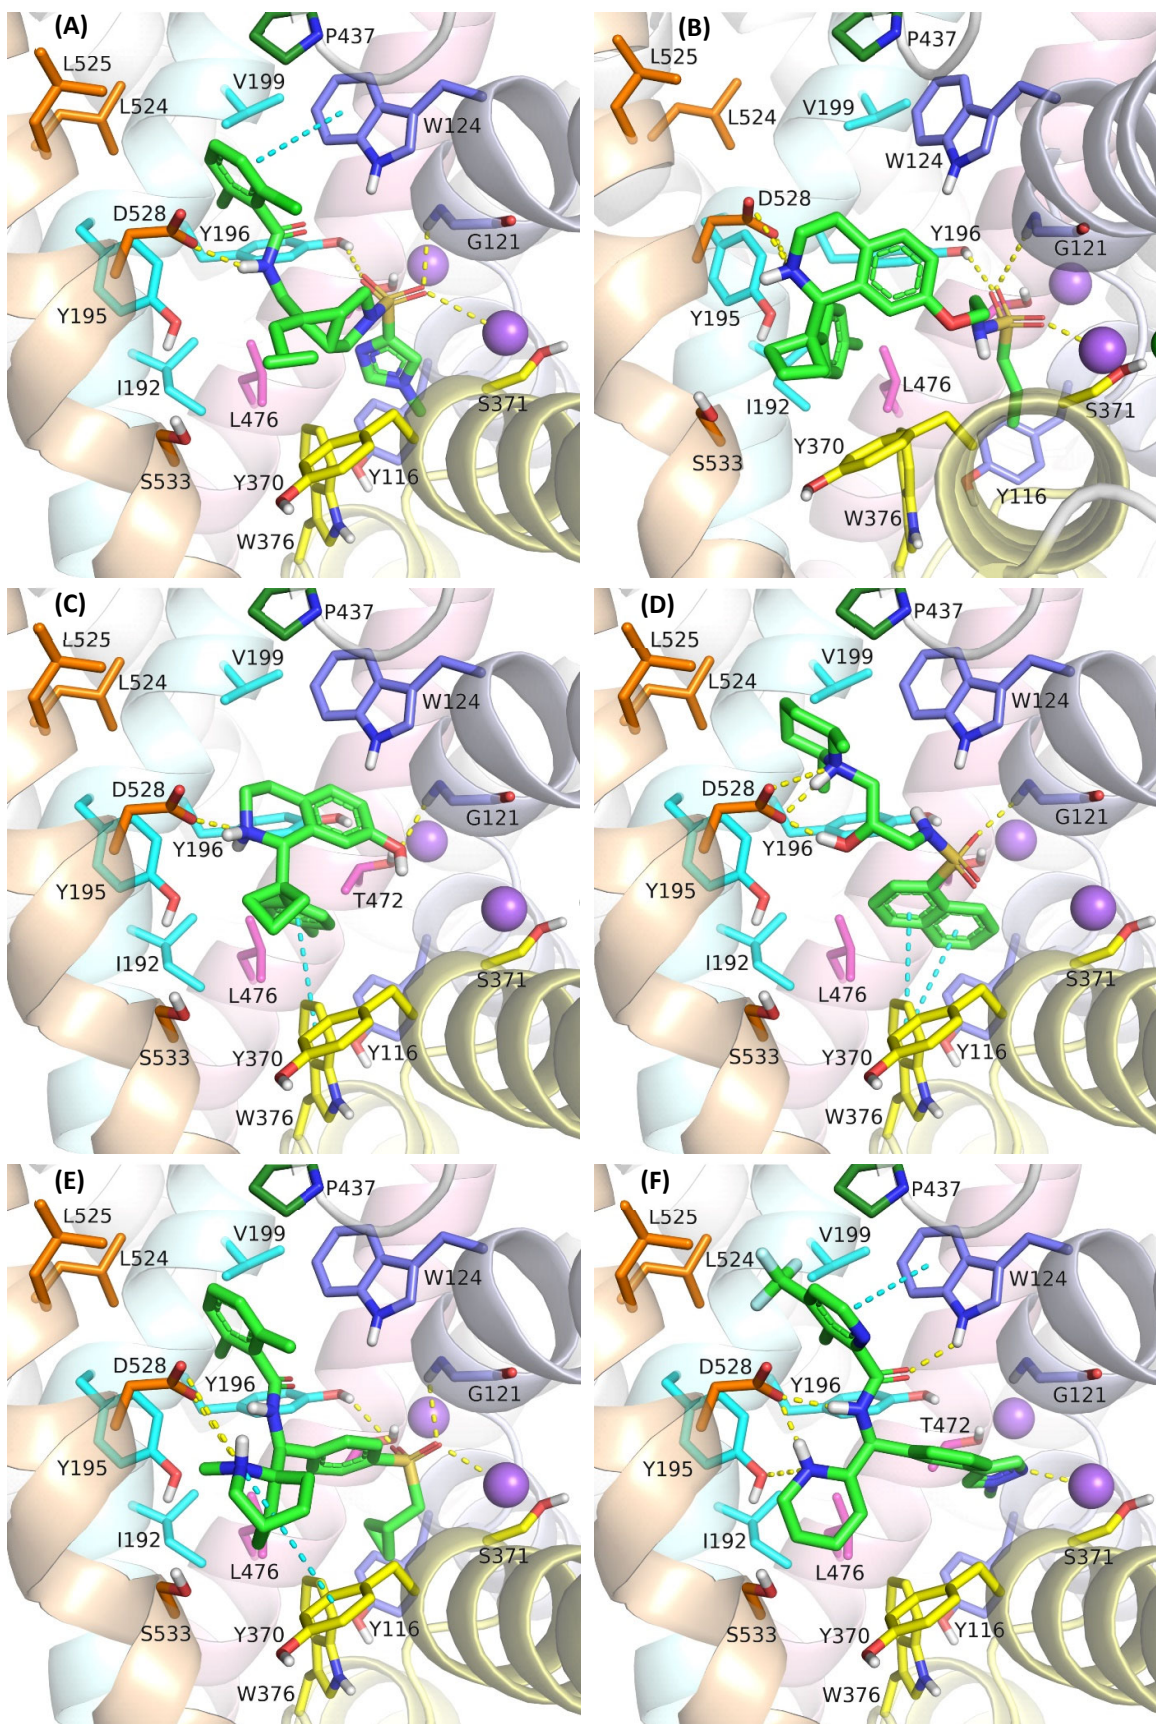

**Figure S6.** Binding mode of the compound 4 (A), compound 5 (B), compound 6 (C), SB733993 (D), compound 7 (E), and compound 8 (F) within GlyT-1 in outward-open state.

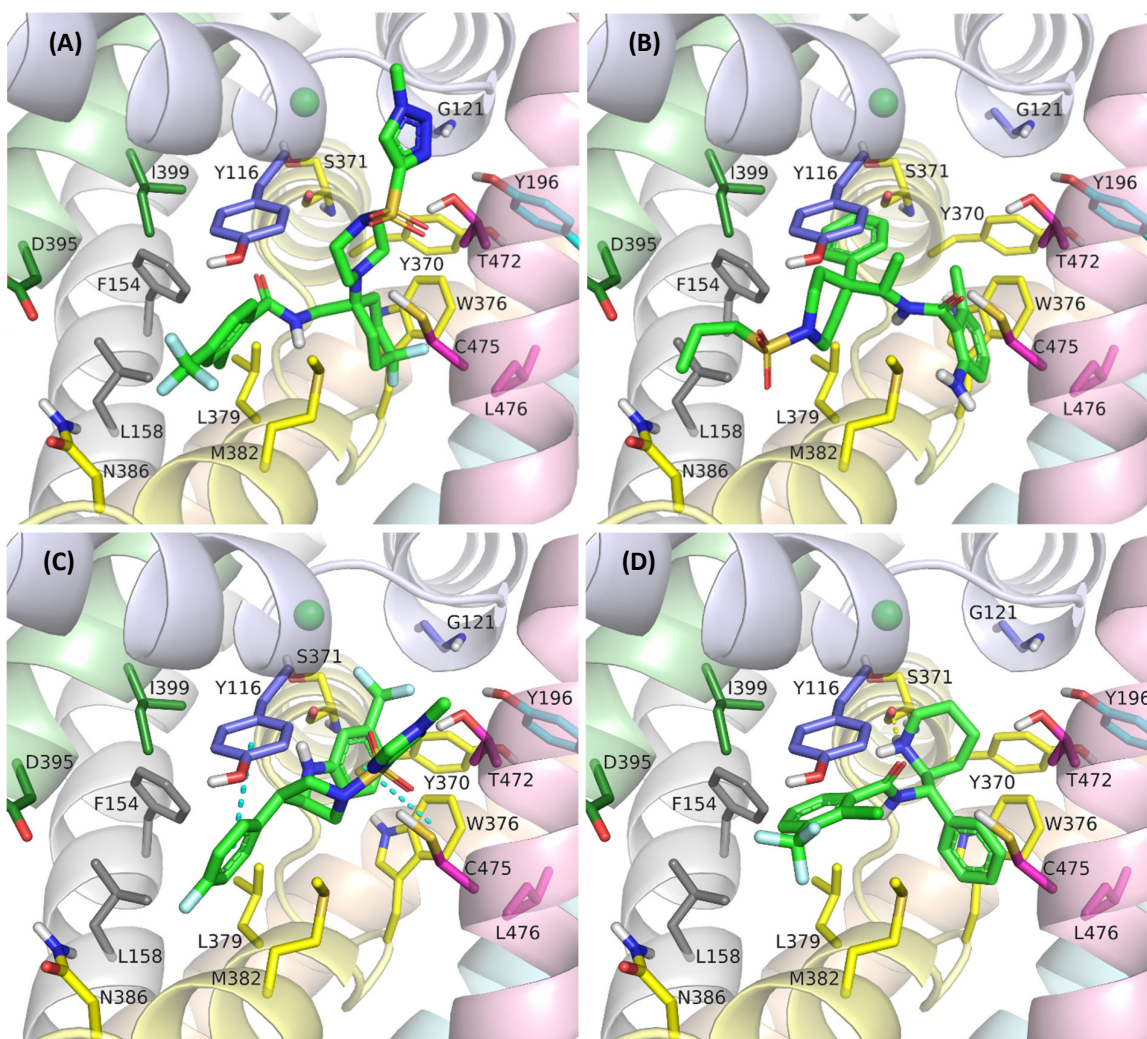

**Figure S7.** Binding mode of the compound **2** (A), ACPPB (B), compound **3** (C), and SSR-504734 (D) within GlyT-1 in inward-open state.



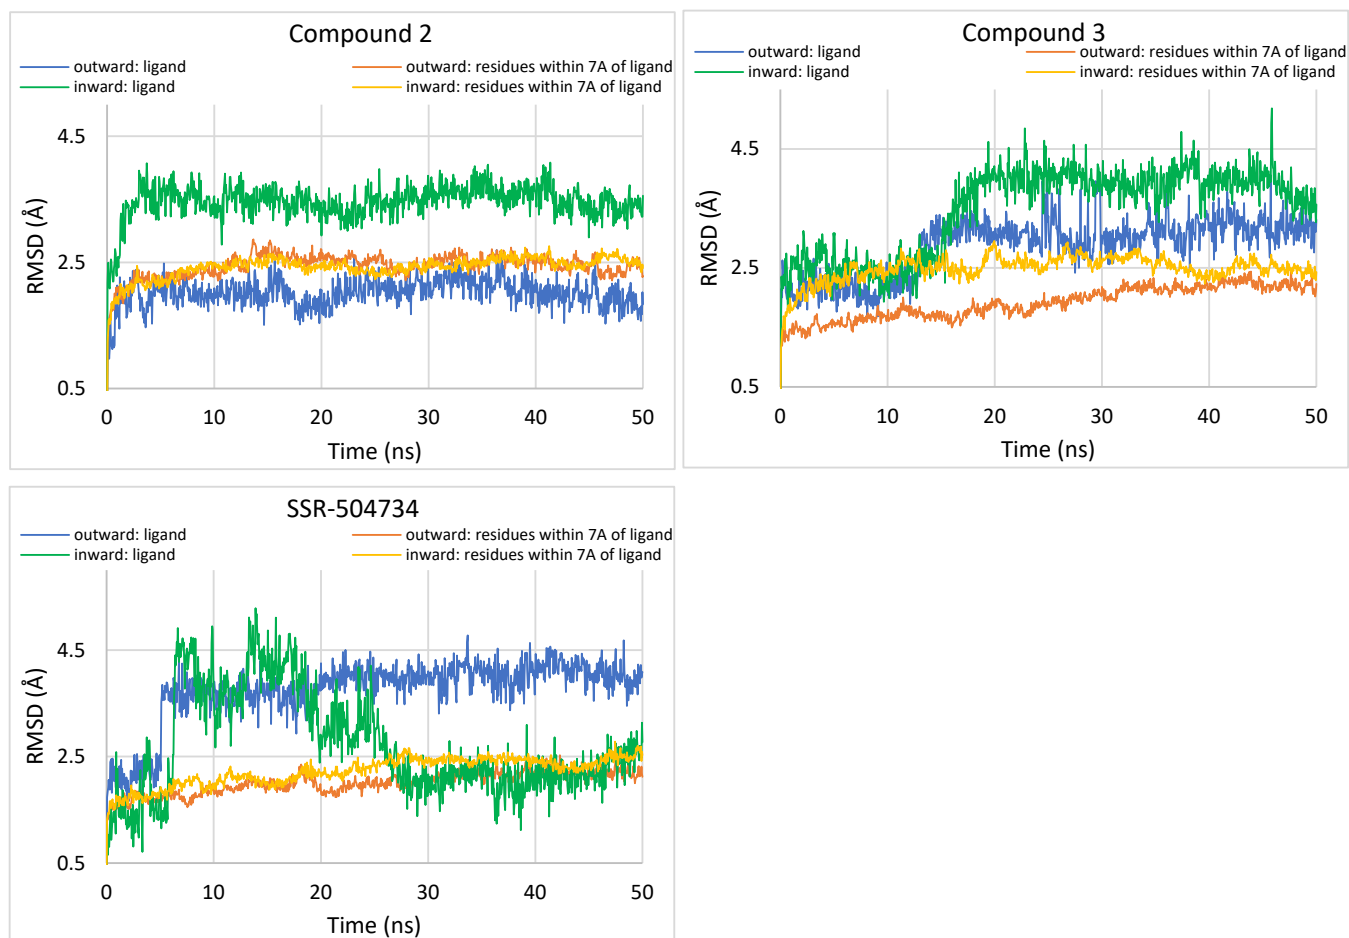

**Figure S8.** Comparison of RMSD changes in the course of molecular dynamics for compound **2**, compound **3**, and SSR-504734 in complex with GlyT-1 in outward-open and inward-open states.

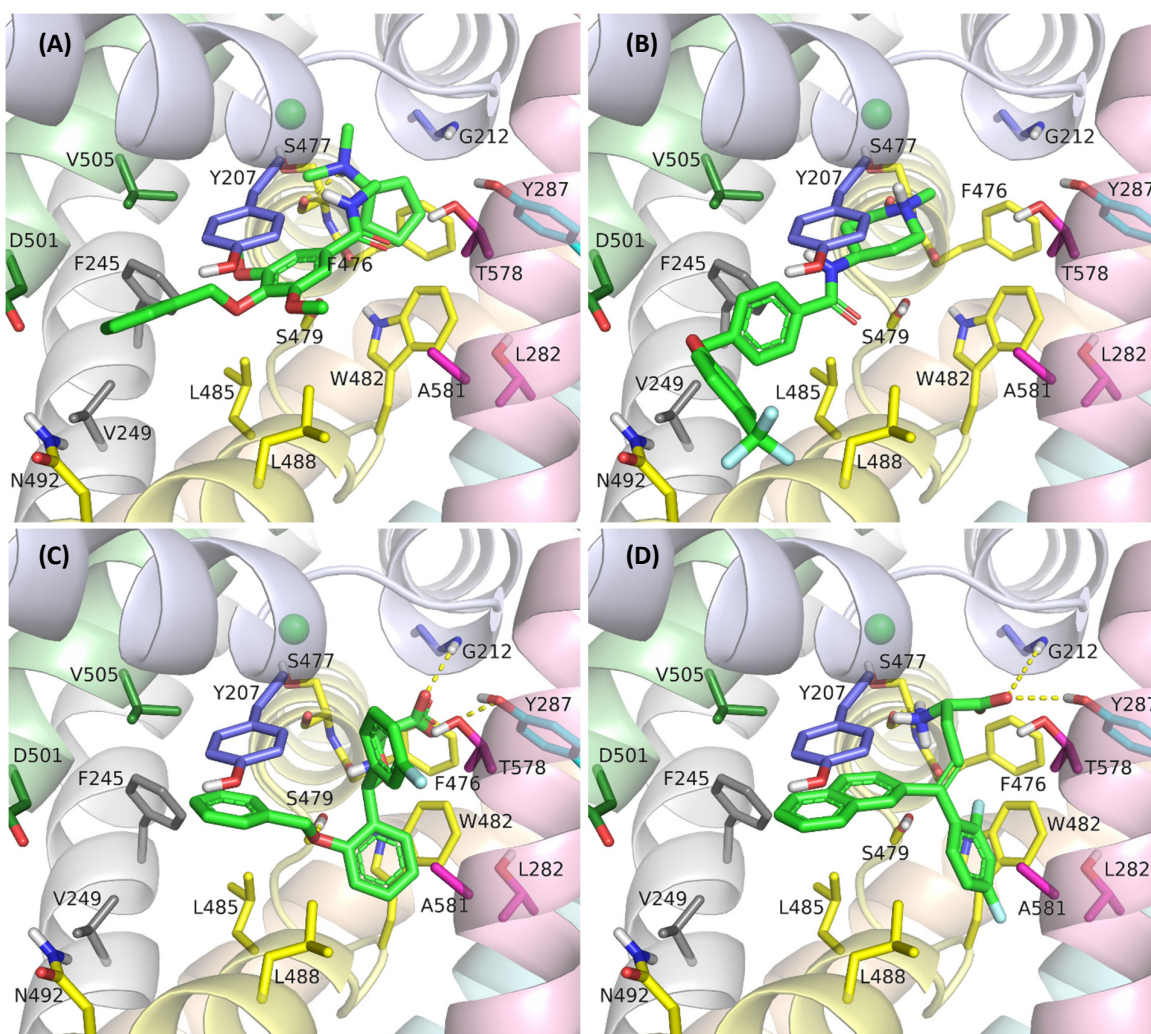

**Figure S9.** Binding mode of the ORG-25543 (A), GT-0198 (B), ALX-1393 (C), and compound 9 (D) within GlyT-2 in inward-open state.

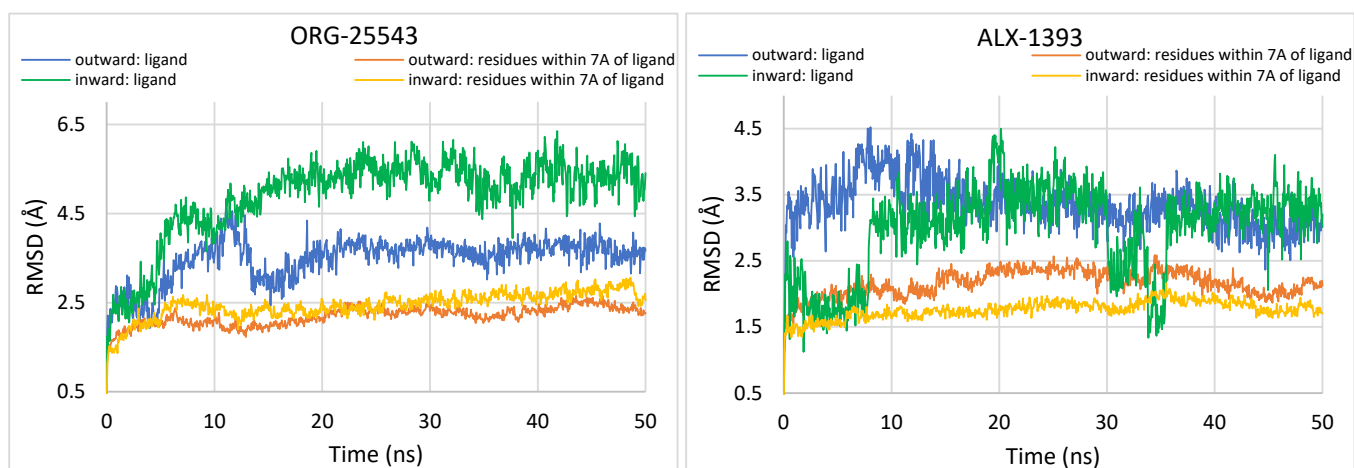

**Figure S10.** Comparison of RMSD changes in the course of molecular dynamics for ORG-25543 and ALX-1393 in complex with GlyT-2 in outward-open and inward-open states.
